# Supplementary material
Source: publisher site journal article supplement (https://zookeys.pensoft.net/article/5901/download/suppl/35/)
Supplement: Supplementary file

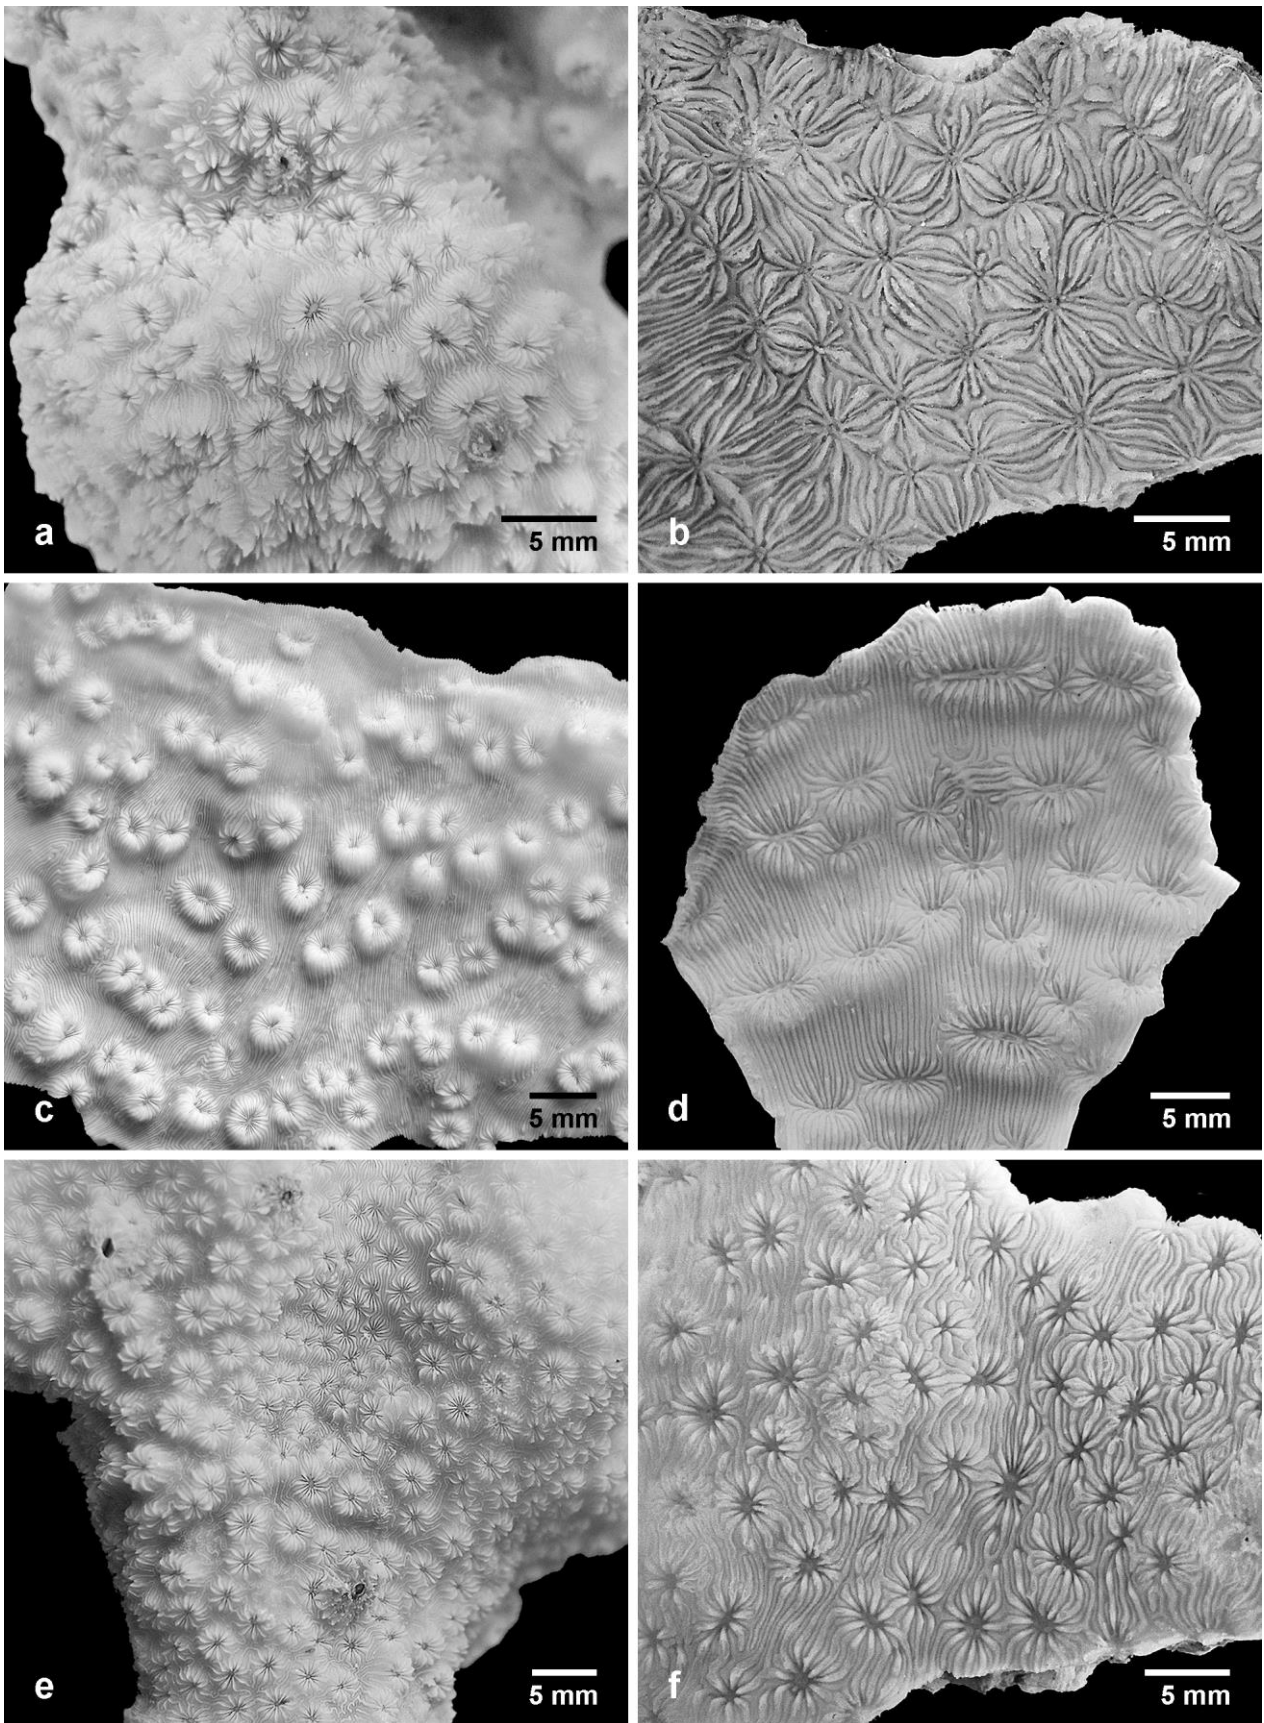

**Supplementary file 5: Figure S2.** Variation of corallite form and structure in *Pavona maldivensis* (a, c, e), and *P. explanulata* (b, d, f). a specimen LAC23 from Layang-Layang, b specimen BAN01 from Banggi, North Borneo, c specimen LOY12 from Loyalty Islands, d specimen BAN02 from Banggi, North Borneo, e specimen MAL from the Maldives, and f specimen TER28 from Ternate, Indonesia.
